# Supplementary figures and images for: Histological analysis of fat grafting with platelet‐rich plasma for diabetic foot ulcers—A randomised controlled trial
Source: PubMed Central journal article supplement — Int Wound J. 2021 Jun 24;19(2):389–98. doi: 10.1111/iwj.13640 (PMC8762540; doi:10.1111/iwj.13640), 2021-06-24

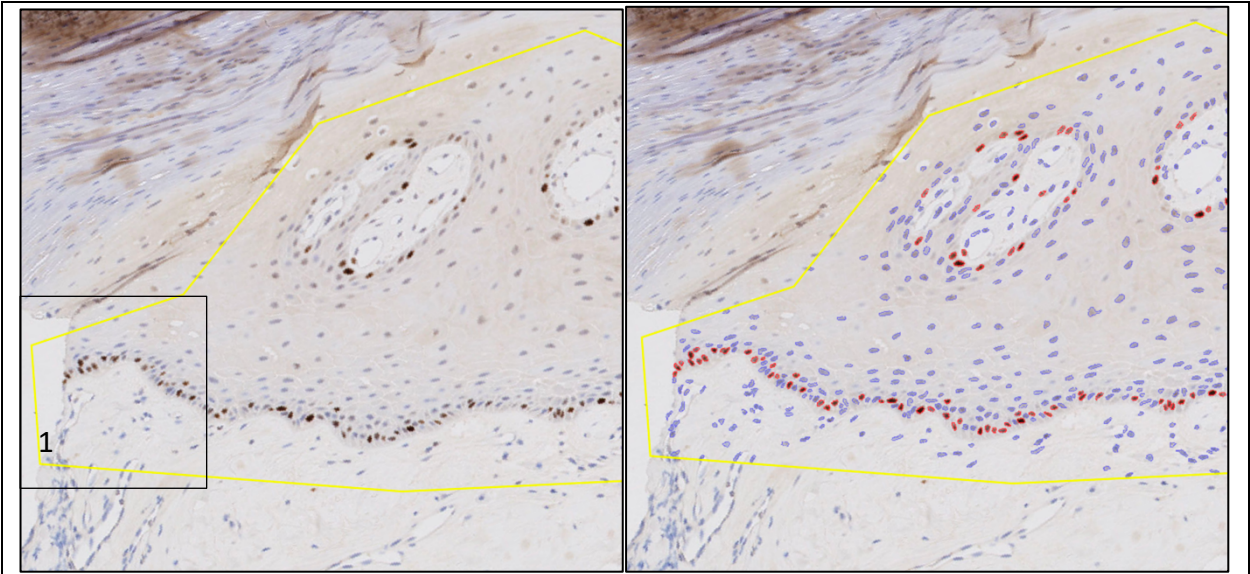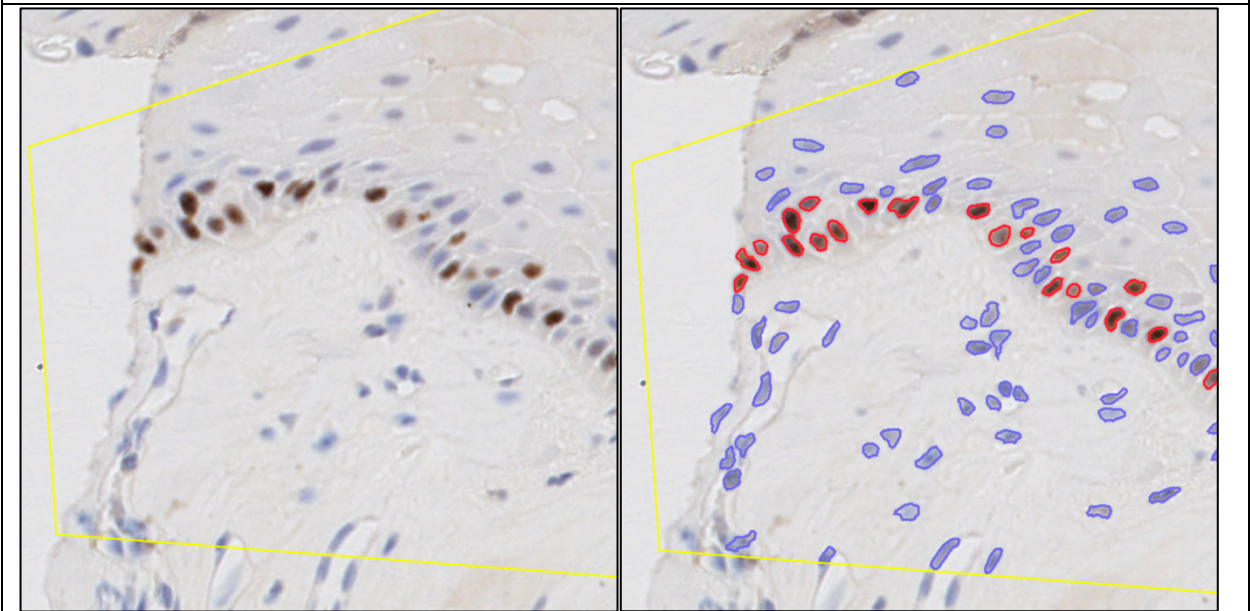

Supplement: IWJ-19-389-s001.pdf [file IWJ-19-389-s001.pdf]
